# Supplementary material
Source: Research Square preprint supplement (doi:10.21203/rs.3.rs-9222304/v1)
Supplement: Supplementary file 1 [file 57819fc492a25d38d9bd6b8f.docx]

**Supplementary Table 1. Frequency class (%) of each pollen type in multifloral honey samples from different regions of Himachal Pradesh**

| **S. No.** | **Pollen types** | **S1H** | **S2H** | **S3H** | **S4H** | **S5H** | **S6H** | **S8H** | **S11H** | **S13H** | **S14H** | **S16H** | **S18H** | **S19H** | **S20H** | **S22H** | **S23H** | **S24H** | **S25H** | **S26H** | **S28H** | **S29H** | **S30H** | **S32H** | **S33H** | **S34H** | **S36H** |
| --- | --- | --- | --- | --- | --- | --- | --- | --- | --- | --- | --- | --- | --- | --- | --- | --- | --- | --- | --- | --- | --- | --- | --- | --- | --- | --- | --- |
| **1** | ***Acacia* sp.** | 8.20 | - | - | 17.74 | - | 12.29 | - | - | - | - | - | - | - | - | - | - | - | - | - | - | - | - | - | - | - | - |
| **2** | ***Acer* sp.** | - | - | - | - | - | - | - | - | - | - | - | - | - | - | - | - | - | - | - | - | - | - | - | 1.86 | - | - |
| **3** | ***Actinidia* sp.** | - | - | - | - | - | - | - | - | - | - | - | - | - | - | - | - | - | 0.54 | - | - | - | - | - | - | - | - |
| **4** | ***Adhatoda* sp.** | - | - | 14.28 | 3.22 | - | - | - | 28.00 | - | - | - | - | - | - | - | - | - | - | - | - | - | - | - | - | - | - |
| **5** | ***Aegle* sp.** | - | - | - | - | - | - | - | 1.34 | - | - | - | - | - | - | - | - | - | - | - | - | - | - | - | - | - | - |
| **6** | ***Aesculus* sp.** | - | - | - | - | - | - | - | - | - | - | - | - | - | - | - | - | - | - | - | 18.23 | - | 11.66 | - | - | - | - |
| **7** | ***Ageratum* sp.** | - | - | - | - | - | - | - | - | - | - | - | - | - | - | - | - | - | - | - | - | 40.54 | - | - | - | - | - |
| **8** | ***Albizia* sp.** | - | 12.95 | 20.55 | - | - | 2.70 | 0.80 | 17.77 | - | - | 22.40 | - | - | - | - | - | - | - | - | - | - | - | - | - | - | - |
| **9** | ***Allium* sp.** | - | - | 7.14 | - | - | - | - | - | - | - | - | - | - | - | - | - | - | - | - | 1.53 | - | 6.66 | - | - | - | - |
| **10** | ***Amaranthus* sp.** | - | - | - | - | - | - | - | - | - | - | - | - | - | - | - | 0.79 | - | 1.09 | - | - | - | - | - | - | - | - |
| **11** | ***Anagallis sp.*** | - | - | - | - | - | - | - | - | - | - | - | - | - | - | - | 13.49 | - | - | - | - | - | - | - | - | - | - |
| **12** | ***Arnebia* sp.** | - | - | - | - | - | - | - | - | - | - | - | - | - | - | - | - | - | - | - | - | - | 1.66 | - | - | - | - |
| **13** | ***Artimissia* sp.** | - | - | - | - | - | - | - | - | - | - | - | - | - | - | - | - | - | - | - | - | - | - | 10.63 | - | - | - |
| **14** | ***Azadirachta* sp.** | - | - | - | - | - | - | 25.47 | - | - | - | - | - | - | - | - | - | - | - | - | - | - | - | - | - | - | - |
| **15** | ***Bauhinia* sp.** | - | 25.18 | - | - | - | 28.20 | - | - | 11.23 | - | - | 29.20 | - | - | - | - | 17.87 | - | - | - | - | - | - | - | - | - |
| **16** | ***Berberis* sp.** | - | - | - | - | - | - | - | - | - | - | - | - | 1.56 | - | 14.67 | - | 16.75 | - | - | 2.30 | - | - | - | 4.69 | - | - |
| **17** | ***Bombax* sp.** | 4.54 | - | - | - | 22.44 | - | - | 29.33 | - | 33.89 | 11.766 | - | - | - | - | - | - | - | - | - | - | - | - | - | - | - |
| **18** | ***Brassica* sp.** | 19.60 | - | - | - | 14.44 | - | 9.67 | - | - | 6.77 | - | - | - | - | - | - | 2.79 | 2.18 | 17.22 | - | 4.05 | - | - | 2.81 | - | - |
| **19** | ***Butea* sp.** | - | - | - | - | - | - | - | - | - | 1.69 | - | - | - | - | - | - | - | - | - | - | - | - | - | - | - | - |
| **20** | ***Callistemon* sp.** | - | - | 12.50 | - | - | - | - | - | - | - | - | - | - | - | - | - | - | - | - | - | - | - | - | - | - | - |
| **21** | ***Cannabis* sp.** | - | - | - | - | - | - | - | - | - | - | - | - | - | - | - | - | - | - | - | 16.92 | - | - | - | - | - | - |
| **22** | ***Capsicum* sp.** | - | - | - | - | - | - | - | - | - | - | - | - | - | - | - | - | - | - | - | 3.00 | - | - | - | - | - | - |
| **23** | ***Carica* sp*.*** | - | 2.16 | - | - | - | - | - | - | - | - | - | - | - | - | - | - | - | - | - | - | - | - | - | - | - | - |
| **24** | ***Caryopteris* sp.** | - | - | - | - | - | - | - | - | - | - | - | 0.56 | - | - | - | - | - | - | - | - | - | - | - | - | - | - |
| **25** | ***Cassia* sp*.*** | - | - | 30.36 | 16.93 | 32.62 | 32.40 | - | - | - | - | - | - | - | - | - | 1.58 | - | - | - | - | - | - | - | - | - | - |
| **26** | ***Chenopodiu***  ***m* sp.** | - | - | - | - | - | - | - | - | - | - | - | - | - | - | - | - | - | - | - | 13.61 | - | - | - | - | - | - |
| **27** | ***Chrysanthe***  ***mum* sp*.*** | 2.02 | - | - | - | - | - | - | - | - | - | - | - | - | - | - | - | - | - | - | - | - | - | - | - | - | - |
| **28** | ***Cirsium* sp.** | - | - | - | - | - | - | - | - | - | 2.35 | - | - | - | - | - | - | - | - | - | - | - | - | - | - | - | - |
| **29** | ***Citrus* sp.** | - | 34.54 | - | - | - | - | 32.64 | 2.67 | - | - | - | - | - | - | - | - | - | - | - | - | - | 26.66 | - | - | - | - |
| **30** | ***Coriandrum sp.*** | - | 2.88 | - | - | 12.92 | - | - | - | - | - | - | 7.34 | - | - | - | - | - | - | - | - | - | - | - | - | - | - |
| **31** | ***Cucumis* sp.** | - | - | - | - | - | - | - | - | - | - | - | - | - | - | - | - | - | - | 2.34 | - | - | - | - | - | - | - |
| **32** | ***Dalbergia* sp.** | 6.90 | - | - | 10.48 | - | - | - | - | 24.71 | - | - | - | - | - | - | - | - | 5.46 | - | - | - | - | - | - | - | - |
| **33** | ***Delphinium* sp.** | - | - | - | - | - | - | - | - | - | - | - | 5.08 | - | - | - | - | - | - | - | - | - | - | - | - | - | - |
| **34** | ***Desmodium* sp.** | - | - | - | - | - | - | - | - | - | - | - | - | - | - | - | - | - | - | - | - | - | 1.66 | - | - | - | - |
| **35** | ***Dianthus* sp*.*** | - | - | - | - | - | - | - | - | - | - | - | - | - | - | - | 0.79 | - | - | - | - | - | - | - | - | - | - |
| **36** | ***Ehretia* sp.** | - | - | - | - | - | - | - | - | - | - | - | - | 1.04 | - | - | - | - | - | - | - | - | - | - | - | - | - |
| **37** | ***Eriobotrya* sp.** | - | - | - | - | - | - | - | - | 1.12 | - | - | - | - | - | - | - | - | - | - | - | - | - | - | - | - | - |
| **38** | ***Eucalyptus* sp.** | 23.10 | - | - | - | - | - | 12.09 | 6.23 | - | - | - | - | - | - | 12.84 | - | - | - | - | - | - | - | - | - | - | - |
| **39** | ***Fagopyrum* sp.** | - | - | - | - | - | - | - | - | - | - | - | - | - | - | - | - | - | - | - | - | - | - | - | - | - | 21.53 |
| **40** | ***Grewia* sp.** | 20.60 | - | - | - | 1.36 | - | - | - | - | 20.38 | - | - | - | - | - | - | 2.79 | 15.98 | - | - | - | - | - | - | - | - |
| **41** | ***Helianthu* sp.** | - | - | - | - | - | - | - | - | 4.49 | - | - | - | - | - | - | - | - | - | 1.56 | - | - | - | - | - | - | - |
| **42** | ***Heracleum* sp.** | - | - | - | - | - | - | - | - | - | - | - | - | - | - | - | - | - | - | - | - | - | - | - | - | - | 1.52 |
| **43** | ***Hibiscus* sp.** | - | - | - | - | - | - | - | - | - | - | - | 2.25 | - | - | - | - | - | - | - | - | - | - | - | - | - | - |
| **44** | ***Hypericum* sp.** | - | - | - | - | - | - | - | - | - | - | - | - | 2.60 | - | - | - | - | - | - | - | - | - | - | - | 1.96 | - |
| **45** | ***Impatiens* sp.** | - | - | - | - | - | - | - | - | - | - | - | - | - | - | - | - | - | - | - | - | - | 0.83 | - | - | - | - |
| **46** | ***Inula* sp.** | - | - | - | - | - | - | - | - | - | - | - | - | - | - | - | - | - | - | - | - | - | - | - | 7.47 | - | - |
| **47** | ***Jacaranda* sp.** | - | - | - | - | - | - | - | - | - | - | 16.50 | 19.76 | - | - | 27.52 | - | - | - | - | - | - | - | - | - | - | - |
| **48** | ***Jasminum* sp.** | - | - | - | - | - | - | 13.70 | - | - | - | 1.13 | - | - | 2.51 | - | - | - | - | - | - | - | - | - | - | - | - |
| **49** | ***Jatropha* sp.** | - | - | - | - | - | 1.46 | - | - | - | - | - | - | - | - | - | - | - | - | - | - | - | - | - | - | - | - |
| **50** | ***Juglans* sp.** | - | - | - | - | - | - | - | - | - | - | - | - | 3.00 | - | - | - | - | 8.74 | - | - | 8.50 | - | - | - | - | - |
| **51** | ***Lavendula* sp.** | - | - | - | - | - | - | - | - | - | - | - | - | - | - | - | - | - | - | - | - | - | 3.00 | - | - | - | - |
| **52** | ***Lonicera* sp.** | - | - | - | - | - | - | - | - | - | - | - | 21.70 | - | - | - | - | - | - | - | - | - | - | - | - | - | - |
| **53** | ***Malus* sp.** | - | - | - | - | - | - | - | - | - | - | - | - | 37.50 | 5.66 | - | - | - | - | - | - | 6.04 | - | - | - | - | - |
| **54** | ***Malvaviscus* sp.** | 2.29 | - | - | - | - | - | - | - | - | - | - | - | - | - | - | - | - | - | - | - | - | - | - | - | - | - |
| **55** | ***Mangifera* sp.** | 11.37 | 6.47 | - | - | 2.63 | 11.49 | - | 8.00 | - | 1.69 | - | - | - | - | - | - | - | - | - | - | - | - | - | - | - | - |
| **56** | ***Medicago* sp.** | - | - | - | - | - | - | - | - | - | - | - | - | 23.43 | - | - | - | - | - | - | - | - | - | - | - | - | - |
| **57** | ***Melia* sp.** | - | - | - | 2.41 | - | - | - | - | - | - | - | - | - | - | - | - | - | - | - | - | - | - | - | - | - | - |
| **58** | ***Moringa* sp.** | - | - | - | - | - | - | 1.61 | - | 1.12 | - | - | - | - | - | - | - | - | - | - | - | - | - | - | - | - | - |
| **59** | ***Murraya* sp.** | 1.38 | - | - | 19.35 | - | - | - | - | - | - | - | - | - | - | 31.19 | - | 12.58 | - | - | - | - | - | - | - | - | - |
| **60** | ***Nicotiana* sp.** | - | - | - | - | - | - | - | - | - | - | - | 2.69 | - | - | - | - | - | - | - | - | - | - | - | - | - | - |
| **61** | ***Nigella* sp.** | - | - | - | - | - | - | - | - | - | - | - | - | - | - | - | - | - | - | - | - | - | - | 26.95 | - | - | 22.30 |
| **62** | ***Opuntia* sp.** | - | - | - | - | - | - | - | - | - | - | 1.18 | - | - | - | - | - | - | - | 5.46 | - | - | - | - | - | - | - |
| **63** | ***Oxyria* sp.** | - | - | - | - | - | - | - | - | - | - | - | - | - | - | - | - | - | - | - | - | 2.02 | - | - | - | 1.30 | - |
| **64** | ***Oxytropis* sp.** | - | - | - | - | - | - | - | - | - | - | - | - | - | - | - | - | - | - | - | - | - | - | 2.12 | - | - | - |
| **65** | ***Papaver* sp.** | - | - | - | - | 11.56 | - | - | - | - | - | - | - | - | - | - | - | - | - | - | - | - | - | - | - | - | - |
| **66** | ***Phaseolus* sp.** | - | - | - | - | - | - | - | - | - | - | - | - | - | - | - | - | - | - | - | - | - | 2.50 | - | - | - | - |
| **67** | ***Phyllanthus* sp.** | - | - | - | 13.70 | - | - | - | - | - | - | - | - | - | - | - | - | - | - | - | - | - | - | - | - | - | - |
| **68** | ***Pistacia* sp.** | - | - | - | - | - | - | - | - | - | - | - | - | - | 1.89 | - | - | - | - | - | - | - | - | - | - | - | - |
| **69** | ***Pisum* sp.** | - | - | - | - | - | - | - | - | - | - | - | - | - | - | - | - | - | - | - | 4.61 | - | - | - | - | - | - |
| **70** | ***Plectranthus* sp.** | - | - | - | - | - | - | - | - | - | - | - | - | - | - | - | - | - | - | - | 30.76 | - | 21.20 | - | - | 17.66 | 24.61 |
| **71** | ***Poaceae*** | - | - | 9.82 | - | - | - | - | - | - | - | - | - | - | - | - | - | - | - | - | 9.04 | - | 19.17 | - | - | - | - |
| **72** | ***Polygonum* sp.** | - | - | - | - | - | - | - | - | - | - | - | - | - | - | - | - | - | - | - | - | 2.70 | - | - | - | - | - |
| **73** | ***Prunus* sp*.*** | - | - | - | - | - | - | - | - | 10.16 | - | 15.20 | - | 15.62 | 39.62 | - | 28.36 | 35.75 | 18.06 | - | - | - | 5.00 | 14.22 | 37.38 | - | 2.31 |
| **74** | ***Psidium* sp.** | - | - | 1.78 | 14.51 | - | - | - | - | - | - | - | - | - | - | - | - | - | 2.74 | - | - | - | - | - | - | - | - |
| **75** | ***Punica* sp.** | - | - | - | - | - | - | - | 6.66 | - | 10.16 | - | - | - | - | - | - | - | - | 7.03 | - | - | - | - | - | - | - |
| **76** | ***Pyrus* sp.** | - | - | - | - | - | - | - | - | - | - | - | - | 14.06 | - | - | 15.87 | - | 4.37 | 8.59 | - | 18.59 | - | - | - | - | - |
| **77** | ***Rhododendron* sp.** | - | - | - | - | - | - | - | - | - | - | - | - | - | 4.40 | - | - | - | - | - | - | - | - | 2.83 | 14.95 | 13.07 | - |
| **78** | ***Ribes* sp.** | - | - | - | - | - | - | - | - | - | - | - | - | - | - | - | - | - | - | - | - | - | - | - | - | 2.61 | 15.38 |
| **79** | ***Robinia* sp.** | - | - | - | - | - | - | - | - | - | - | - | - | - | 11.33 | - | - | 11.48 | 20.21 | - | - | - | - | 11.34 | 30.84 | - | - |
| **80** | ***Rosa* sp.** | - | - | - | - | - | - | - | - | - | - | - | - | - | - | - | - | - | 1.63 | - | - | - | - | 31.91 | - | 0.65 | - |
| **81** | ***Rubus* sp*.*** | - | 14.38 | - | - | - | - | - | - | - | - | - | - | - | - | 0.91 | 12.69 | 1.11 | - | - | - | - | - | - | - | - | - |
| **82** | ***Rumex sp.*** | - | - | - | 1.66 | - | - | - | - | - | - | - | - | - | - | - | - | - | - | - | - | - | - | - | - | - | - |
| **83** | ***Salix* sp*.*** | - | - | - | - | - | - | - | - | - | 8.47 | - | - | - | - | 1.83 | - | - | 19.00 | - | - | - | - | - | - | - | - |
| **84** | ***Salvia* sp.** | - | - | - | - | - | - | - | - | - | - | - | - | 2.08 | - | - | - | - | - | - | - | - | - | - | - | - | - |
| **85** | ***Sapindus* sp.** | - | - | - | - | - | - | - | - | 28.08 | - | - | - | - | - | - | - | - | - | 40.62 | - | - | - | - | - | - | - |
| **86** | ***Syzygium* sp.** | - | - | - | - | - | - | - | - | - | 16.94 | - | - | - | - | - | - | - | - | - | - | - | - | - | - | - | - |
| **87** | ***Taraxacum* sp.** | - | - | - | - | - | - | - | - | - | - | - | 12.42 | - | - | - | - | - | - | - | - | - | - | - | - | - | - |
| **88** | ***Terminalia* sp.** | - | - | - | - | - | - | - | - | - | - | - | - | - | - | 2.57 | - | - | - | - | - | - | - | - | - | - | - |
| **89** | ***Thymus* sp.** | - | - | - | - | - | - | - | - | - | - | - | - | - | - | - | - | - | - | - | - | - | - | - | - | 28.10 | - |
| **90** | ***Toona* sp*.*** | - | - | 0.90 | - | - | - | 2.41 | - | - | - | - | - | - | - | 10.09 | - | - | - | - | - | - | - | - | - | - | - |
| **91** | ***Trifolium* sp.** | - | - | - | - | 2.03 | 9.30 | - | - | 16.85 | - | 10.58 | - | - | 33.33 | - | 24.05 | - | - | 16.40 | - | 17.56 | - | - | - | 34.64 | 9.35 |
| **92** | ***Trigonella* sp.** | - | - | - | - | - | 2.16 | - | - | - | - | - | - | - | - | - | - | - | - | - | - | - | - | - | - | - | - |
| **93** | ***Verbascum* sp.** | - | - | - | - | - | - | - | - | - | - | - | - | - | - | - | - | - | - | - | - | - | - | - | - | - | 3.00 |
| **94** | ***Viola* sp.** | - | - | - | - | - | - | - | - | - | - | - | - | - | - | - | 2.38 | - | - | - | - | - | - | - | - | - | - |
| **95** | ***Vitex* sp.** | - | - | 2.67 | - | - | - | 1.62 | - | - | - | - | - | - | - | - | - | - | - | - | - | - | - | - | - | - | - |
| **96** | ***Woodfordia* sp.** | - | - | - | - | - | - | - | - | 2.24 | - | 18.90 | - | - | 1.26 | - | - | - | - | 0.78 | - | - | - | - | - | - | - |
